# Supplementary material
Source: PubMed Central journal article supplement (PMC8682663)
Supplement: NIHMS1721271-supplement-Supplemental_Figure_1.pdf [file NIHMS1721271-supplement-Supplemental_Figure_1.pdf]

# Supplemental Figure 1

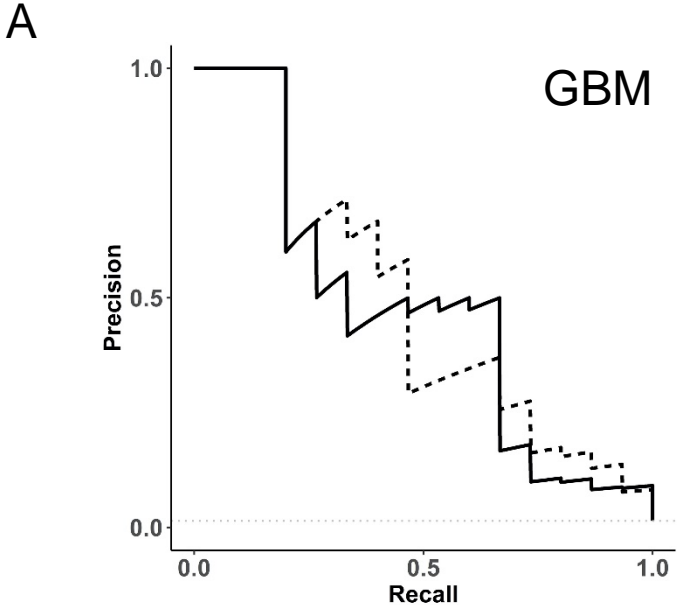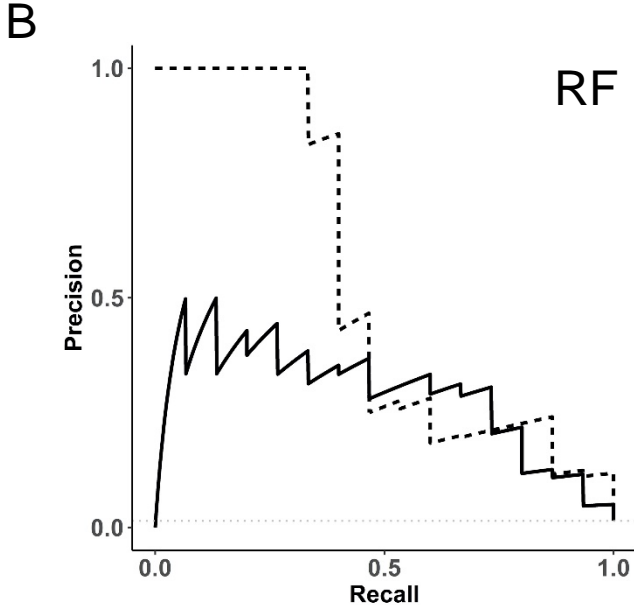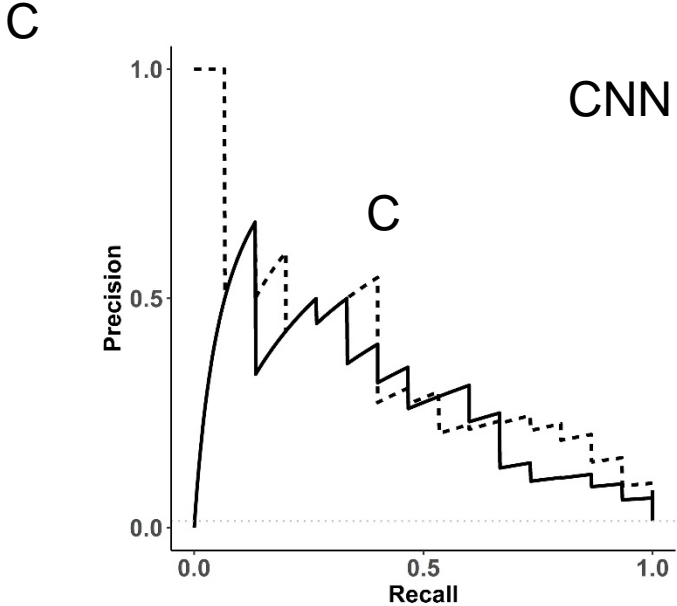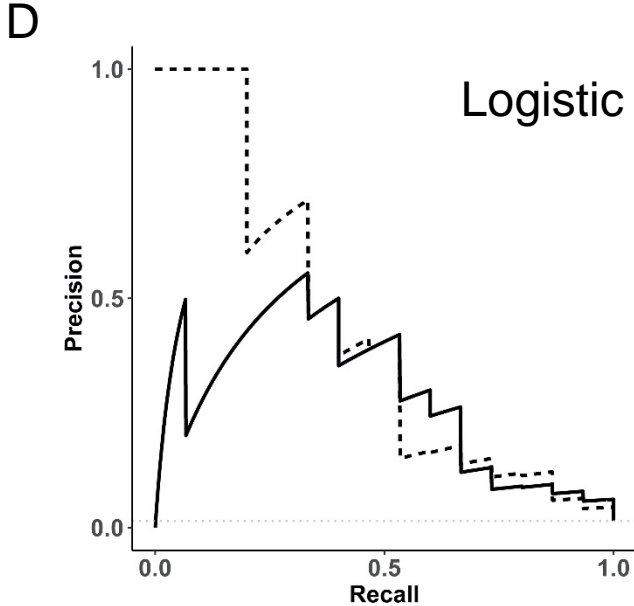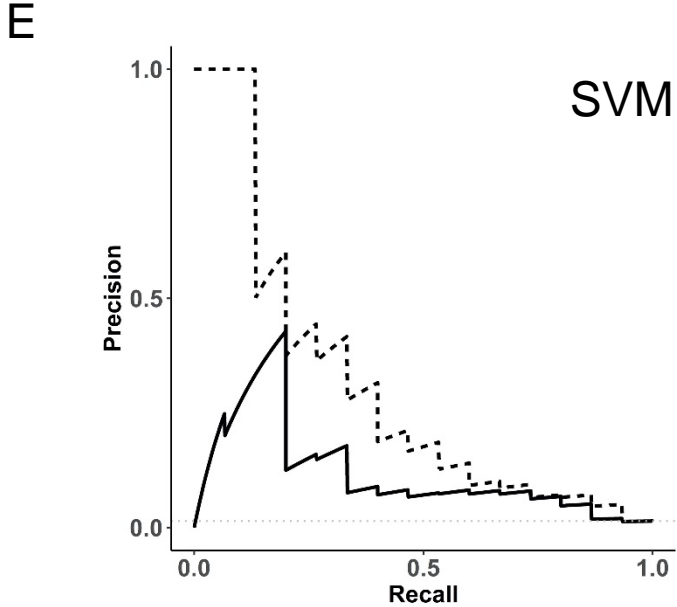

— Preoperative  
- - - Intraoperative

**Supplemental Figure 1.** Area under the precision-recall curve for preoperative and preoperative + intraoperative machine learning models to predict 30-day mortality in intraabdominal surgery patients. Algorithms evaluated were (A) gradient boosting machine (GBM), (B) random forest (RF), (C) convolutional neural networks (CNN), (D) logistic regression (logistic), and (E) support vector machine (SVM).
