# Supplementary material
Source: PubMed Central journal article supplement (PMC8682663)
Supplement: NIHMS1721271-supplement-Supplemental_Table_5.pdf [file NIHMS1721271-supplement-Supplemental_Table_5.pdf]

**Supplemental Table 5.** Area under the curve of the precision-recall curve of preoperative and intraoperative models to predict 30-day mortality in intraabdominal surgery patients.

| Algorithm                    | Preoperative Model |              | Intraoperative Model |              | P-value* |
|------------------------------|--------------------|--------------|----------------------|--------------|----------|
|                              | AUC                | 95% CI       | AUC                  | 95% CI       |          |
| Gradient Boosting Machine    | 0.48               | [0.25, 0.70] | 0.50                 | [0.25, 0.73] | 0.4      |
| Convolutional Neural Network | 0.30               | [0.14, 0.57] | 0.37                 | [0.18, 0.63] | 0.15     |
| Random Forest                | 0.30               | [0.16, 0.55] | 0.53                 | [0.30, 0.75] | 0.01     |
| Logistic Regression          | 0.30               | [0.14, 0.55] | 0.43                 | [0.20, 0.67] | 0.07     |
| Support Vector Machine       | 0.12               | [0.05, 0.30] | 0.31                 | [0.10, 0.54] | 0.01     |

AUC, area under the curve of the precision-recall curve; CI, confidence interval.

AUCs are reported as applied in the test cohort.

Intraoperative model includes both preoperative and intraoperative variables.

\*P-value compares the preoperative model to the intraoperative model.
